# Supplementary material
Source: PubMed Central journal article supplement (PMC9470512)
Supplement: 40258_2022_757_MOESM1_ESM.pdf [file 40258_2022_757_MOESM1_ESM.pdf]

# **Determinants of COVID-19 Vaccine Rollouts and Their Effects on Health**

## **Outcomes: Annex**

### **Running title: Drivers and Effects of COVID-19 Vaccines: Annex**

Pragyan Deb<sup>1</sup>, Davide Furceri<sup>1</sup>, Daniel Jimenez<sup>1†</sup>,

Siddharth Kothari<sup>1</sup>, Jonathan D. Ostry<sup>2</sup>, and Nour Tawk<sup>1</sup>

#### **Abstract**

**Background:** Vaccination against the coronavirus disease (SARS-CoV -2) is understood to be the key way out of the COVID-19 pandemic. Limited evidence exists on the determinants of vaccine rollouts and their health effects at the country level.

**Objective:** Examine the determinants of COVID-19 vaccine rollouts and their effects on health outcomes.

**Methods:** Ordinary least squares regressions with standard errors clustered at the country level for Cross-section and Panel daily data of vaccinations and various health outcomes (new COVID-19 cases, fatalities, intensive care unit (ICU) admissions) for an unbalanced sample of about 200 countries during the period December 16, 2020-June 20, 2021.

**Results:** We find evidence that: (i) early vaccine procurement, domestic production of vaccines, the severity of the pandemic, a country's health infrastructure, and vaccine acceptance are significant determinants of the speed of vaccination rollouts; (ii) vaccine deployment significantly reduces new COVID-19 infections, Intensive Care Unit (ICU) admissions, and fatalities, and is more effective when coupled with stringent containment measures, or when a country is experiencing a large outbreak; and (iii) COVID-19 cases in neighboring countries can lead to an increase in a country's domestic caseload, and hamper efforts in taming its own local outbreak.

---

<sup>1</sup> International Monetary Fund, Washington, DC 20431, USA

<sup>2</sup> Georgetown University, Washington, DC 20057, USA

† Corresponding author: [djimenez@imf.org](mailto:djimenez@imf.org)

**Conclusions:** By providing an early broad overview of the quantitative empirical estimates of the determinants of vaccine rollouts and the effects of COVID-19 vaccines, our paper can help policymakers make informed decisions about local and global distributions of vaccines, as well as related policy tools, such as containment measure.

**Key Points for Decision Makers:**

1. The success of a country's vaccine deployment in the first half of 2021 was driven by five primary factors: the severity of its pandemic waves in 2020, its procurement strategies, the quantity of locally produced vaccines, the quality of health infrastructure, and vaccine acceptance.
2. Swift and broad administration of vaccines provides a significant boost to health outcomes, particularly in the midst of major outbreaks and accompanied by containment measures.
3. Cross-country health spillovers from vaccine rollouts mean the pandemic will not be over anywhere until it is over everywhere.

**JEL Classification Numbers:** C31; C33, E65, O50, F4.

**Keywords:** COVID-19; pandemics; vaccinations; containment measures.

**Authors' Email Address:**, [dfurceri@imf.org](mailto:dfurceri@imf.org), [djimenez@imf.org](mailto:djimenez@imf.org), [skothari@imf.org](mailto:skothari@imf.org), [jdo58@georgetown.edu](mailto:jdo58@georgetown.edu), [ntawk@imf.org](mailto:ntawk@imf.org).

**Annex Table A.1: Country list**

|                          |                                   |               |                 |                  |                                |
|--------------------------|-----------------------------------|---------------|-----------------|------------------|--------------------------------|
| Afghanistan              | Cameroon                          | Gabon         | Kyrgyz Republic | New Zealand      | South Sudan                    |
| Albania                  | Canada                            | Gambia, The   | Lao P.D.R.      | Nicaragua        | Spain                          |
| Algeria                  | Cayman Islands                    | Georgia       | Latvia          | Niger            | Sri Lanka                      |
| Andorra                  | Central African Republic          | Germany       | Lebanon         | Nigeria          | St. Kitts and Nevis            |
| Angola                   | Chad                              | Ghana         | Lesotho         | North Macedonia  | St. Lucia                      |
| Anguilla                 | Chile                             | Gibraltar     | Liberia         | Norway           | St. Vincent and the Grenadines |
| Antigua and Barbuda      | China                             | Greece        | Libya           | Oman             | Sudan                          |
| Argentina                | Colombia                          | Greenland     | Liechtenstein   | Pakistan         | Suriname                       |
| Armenia                  | Comoros                           | Grenada       | Lithuania       | Palestan         | Sweden                         |
| Aruba                    | Congo, Democratic Republic of the | Guatemala     | Luxembourg      | Panama           | Switzerland                    |
| Australia                | Congo, Republic of                | Guinea        | Macao SAR       | Papua New Guinea | Syria                          |
| Austria                  | Costa Rica                        | Guinea-Bissau | Madagascar      | Paraguay         | São Tomé and Príncipe          |
| Azerbaijan               | Croatia                           | Guyana        | Malawi          | Peru             | Taiwan Province of China       |
| Bahamas, The             | Cuba                              | Honduras      | Malaysia        | Philippines      | Tajikistan                     |
| Bahrain                  | Curaçao                           | Hong Kong SAR | Maldives        | Poland           | Thailand                       |
| Bangladesh               | Cyprus                            | Hungary       | Mali            | Portugal         | Timor-Leste                    |
| Barbados                 | Czech Republic                    | Iceland       | Malta           | Qatar            | Togo                           |
| Belarus                  | Côte d'Ivoire                     | India         | Mauritania      | Romania          | Tonga                          |
| Belgium                  | Denmark                           | Indonesia     | Mauritius       | Russia           | Trinidad and Tobago            |
| Belize                   | Djibouti                          | Iran          | Mexico          | Rwanda           | Tunisia                        |
| Benin                    | Dominica                          | Iraq          | Moldova         | Samoa            | Turkey                         |
| Bermuda                  | Dominican Republic                | Ireland       | Monaco          | San Marino       | Turkmenistan                   |
| Bhutan                   | Ecuador                           | Isle of Man   | Mongolia        | Senegal          | Turks and Caicos Islands       |
| Bolivia                  | Egypt                             | Israel        | Montenegro      | Serbia           | Tuvalu                         |
| Bosnia and Herzegovina   | El Salvador                       | Italy         | Montserrat      | Seychelles       | Uganda                         |
| Botswana                 | Equatorial Guinea                 | Jamaica       | Morocco         | Sierra Leone     | Ukraine                        |
| Brazil                   | Estonia                           | Japan         | Mozambique      | Singapore        | United Arab Emirates           |
| British virgin Islands   | Eswatini                          | Jersey        | Myanmar         | Sint Maarten     | United Kingdom                 |
| Brunei Darussalam        | Ethiopia                          | Jordan        | Namibia         | Slovak Republic  | United States                  |
| Bulgaria                 | Fiji                              | Kazakhstan    | Nauru           | Slovenia         | Uruguay                        |
| Burkina Faso             | Finland                           | Kenya         | Nepal           | Solomon Islands  | Uzbekistan                     |
| Cabo Verde               | France                            | Korea         | Netherlands     | Somalia          | Vanuatu                        |
| Cambodia                 | French Polynesia                  | Kuwait        | New Caledonia   | South Africa     | Venezuela                      |
| Cameroon                 | Greenland                         | Maldives      | San Marino      | United States    |                                |
| Canada                   | Grenada                           | Mali          | Senegal         | Uruguay          |                                |
| Cayman Islands           | Guatemala                         | Malta         | Serbia          | Uzbekistan       |                                |
| Central African Republic | Guinea                            | Mauritania    | Seychelles      | Vanuatu          |                                |
| Chad                     | Guinea-Bissau                     | Mauritius     | Sierra Leone    | Venezuela        |                                |

|       |          |         |              |         |  |
|-------|----------|---------|--------------|---------|--|
| Chile | Guyana   | Mexico  | Singapore    | Vietnam |  |
| China | Honduras | Moldova | Sint Maarten | Yemen   |  |

## Annex Table A.2: Summary Statistics

| Panel A: Summary Statistics for Time-Varying data    |        |        |           |         |        |            |                 |                  |
|------------------------------------------------------|--------|--------|-----------|---------|--------|------------|-----------------|------------------|
|                                                      | Obs.   | Mean   | Std. Dev. | Min     | Max    | Source     | Starting Date   | No. of countries |
| New COVID-19 Cases per 10000 population              | 71,896 | 1.01   | 2.34      | 0.00    | 182.94 | JHU        | 22-Jan-20       | 210              |
| New COVID-19 Deaths per 10000 population             | 46,569 | 0.03   | 0.06      | 0.00    | 2.67   | JHU        | 22-Jan-20       | 200              |
| Vaccinations per 100 population (1st dose)           | 23,257 | 13.26  | 17.73     | 0.00    | 116.15 | OWID       | 16-Dec-20       | 202              |
| Vaccinations per 100 population (2nd dose)           | 15,257 | 9.59   | 14.27     | 0.00    | 114.86 | OWID       | 27-Dec-20       | 180              |
| ICU Admissions per 10000                             | 9,680  | 0.27   | 0.27      | 0.00    | 1.93   | OWID       | 28-Jan-20       | 23               |
| Procurement per 100 (confirmed)                      | 22,367 | 42.93  | 73.09     | 0.04    | 520.10 | Duke       | 1-May-20        | 101              |
| Procurement per 100 (potential)                      | 22,689 | 55.53  | 101.88    | 0.04    | 824.70 | Duke       | 1-May-20        | 102              |
| Stringency                                           | 90,576 | 0.56   | 0.23      | 0.03    | 1.00   | OxCGRT     | 20-Jan-20       | 184              |
| Retail Mobility                                      | 63,740 | -21.66 | 25.07     | -100.00 | 181.00 | Google     | 15-Feb-20       | 135              |
| Vaccine Acceptance                                   | 12,972 | 0.71   | 0.14      | 0.20    | 0.97   | UMD        | 21-Dec-20       | 100              |
| Panel B: Summary Statistics for Cross-Sectional data |        |        |           |         |        |            |                 |                  |
|                                                      | Obs.   | Mean   | Std. Dev. | Min     | Max    | Source     | Date            |                  |
| Health Index                                         | 137    | 6.15   | 0.93      | 2.67    | 6.98   | WEF        | 2019            |                  |
| Global Health Security Index                         | 191    | 40.58  | 14.41     | 16.20   | 83.50  | GHS        | 2019            |                  |
| Beds per 1000 people                                 | 204    | 3.06   | 2.42      | 0.10    | 13.80  | World Bank | Latest reported |                  |
| Physicians per 1000 People                           | 237    | 1.80   | 1.60      | 0.01    | 8.42   | World Bank | Latest reported |                  |

**Annex Table A3. Robustness Checks - Baseline**

|                                | Baseline                |                         | Hodrick–Prescott filter |                         | Hamilton Filter         |                         |
|--------------------------------|-------------------------|-------------------------|-------------------------|-------------------------|-------------------------|-------------------------|
|                                | (1)<br>Cases/Pop        | (2)<br>Cases/Pop        | (3)<br>Cases/Pop        | (4)<br>Cases/Pop        | (5)<br>Cases/Pop        | (6)<br>Cases/Pop        |
| First vaccine dose/population  | -0.000986***<br>(0.000) | -0.000898***<br>(0.000) | -0.001013***<br>(0.000) | -0.000919***<br>(0.000) | -0.000932***<br>(0.000) | -0.000860***<br>(0.000) |
| Second vaccine dose/population |                         | -0.000222<br>(0.000)    |                         | -0.000238<br>(0.000)    |                         | -0.000171<br>(0.000)    |
| Containment measures           | -0.009603<br>(0.008)    | -0.010365<br>(0.008)    | -0.011902<br>(0.008)    | -0.012719*<br>(0.008)   | -0.007678<br>(0.007)    | -0.008276<br>(0.007)    |
| Mobility                       | 0.000100**<br>(0.000)   | 0.000103***<br>(0.000)  | 0.000092**<br>(0.000)   | 0.000095**<br>(0.000)   | 0.000073*<br>(0.000)    | 0.000074*<br>(0.000)    |
| Lagged cases/pop               | 0.00161<br>(0.003)      | 0.001816<br>(0.003)     | 0.002888<br>(0.003)     | 0.003070<br>(0.003)     | -0.001994<br>(0.003)    | -0.001904<br>(0.003)    |
| Constant                       | -1.973306<br>(1.544)    | -1.318626<br>(1.768)    | -3.394891***<br>(0.671) | -3.146237***<br>(0.767) | -3.345503***<br>(0.683) | -3.145070***<br>(0.764) |
| Observations                   | 13,542                  | 13,455                  | 13,542                  | 13,455                  | 13,542                  | 13,455                  |
| R-squared                      | 0.624                   | 0.625                   | 0.794                   | 0.794                   | 0.390                   | 0.390                   |
| Lags 1st dose/2nd dose         | 21                      | 21/7                    | 21                      | 21/7                    | 21                      | 21/7                    |
| Health policy controls         | Yes                     | Yes                     | Yes                     | Yes                     | Yes                     | Yes                     |
| Country FE                     | Yes                     | Yes                     | Yes                     | Yes                     | Yes                     | Yes                     |
| Time FE                        | Yes                     | Yes                     | Yes                     | Yes                     | Yes                     | Yes                     |
| Country-Time FE                | Yes                     | Yes                     | Yes                     | Yes                     | Yes                     | Yes                     |
| No. of countries               | 126                     | 126                     | 126                     | 126                     | 126                     | 126                     |

**Note:** Table reports results baseline results for equation (2) when filtering the dependant variable using the Hodrick–Prescott filter (columns 3,4) and the Hamilton filter (columns 5,6). The dependent variable is new COVID-19 cases, The regressions control for stringency of containment measures, other non-pharmaceutical interventions and health policy controls, mobility, lagged cases, country specific time trends, as well as country and time fixed effects. Standard errors are clustered at the country level. \*\*\*, \*\*, and \* represent statistical significant at 1, 5 and 10 percent respectively.

**Annex Table A4. Robustness Checks - Rollout**

|                                  | (1)<br>Confirmed<br>Procurement<br>- Jan 2021 | (2)<br>Confirmed<br>Procurement<br>- Oct 2020 | (3)<br>Potential<br>Procurement<br>- Oct 2020 | (4)<br>Confirmed<br>Procurement<br>- latest | (5)<br>Procurement<br>- Airfinity | (6)<br>GHS Health    | (7)<br>Doctors        | (8)<br>Hospital<br>Beds |
|----------------------------------|-----------------------------------------------|-----------------------------------------------|-----------------------------------------------|---------------------------------------------|-----------------------------------|----------------------|-----------------------|-------------------------|
| Procurement (Jan 2021)           | 0.0669***<br>(0.0207)                         |                                               |                                               |                                             |                                   |                      |                       |                         |
| Cumulative cases (end-2020)      | 5.502***<br>(0.978)                           | 5.173***<br>(0.941)                           | 5.154***<br>(0.937)                           | 5.242***<br>(0.990)                         | 5.782***<br>(1.436)               | 5.639***<br>(1.016)  | 3.771***<br>(1.097)   | 6.425***<br>(0.985)     |
| Health index (WEF)               | 8.327***<br>(2.318)                           | 9.547***<br>(2.334)                           | 9.715***<br>(2.340)                           | 9.201***<br>(2.428)                         | 9.880***<br>(3.226)               |                      |                       |                         |
| Vaccine acceptance (Jan 2021)    | 30.80***<br>(10.93)                           | 30.11***<br>(11.21)                           | 29.91***<br>(11.23)                           | 30.58***<br>(11.26)                         | 3.269<br>(14.10)                  | 16.20<br>(10.76)     | 41.54***<br>(9.758)   | 42.54***<br>(12.05)     |
| Procurement (Oct 2020)           |                                               | 0.0802***<br>(0.0271)                         |                                               |                                             |                                   |                      |                       |                         |
| Potential procurement (Oct 2020) |                                               |                                               | 0.0570***<br>(0.0167)                         |                                             |                                   |                      |                       |                         |
| Potential procurement (latest)   |                                               |                                               |                                               | 0.0300**<br>(0.0128)                        |                                   |                      |                       |                         |
| Procurement (Airfinity)          |                                               |                                               |                                               |                                             | 0.0298***<br>(0.0108)             |                      |                       |                         |
| Potential procurement (Jan 2021) |                                               |                                               |                                               |                                             |                                   | 0.0392**<br>(0.0165) | 0.0480***<br>(0.0164) | 0.0619***<br>(0.0133)   |
| Health index (GHS)               |                                               |                                               |                                               |                                             |                                   | 0.489***<br>(0.148)  |                       |                         |
| Doctors per capita               |                                               |                                               |                                               |                                             |                                   |                      | 6.567***<br>(1.268)   |                         |
| Hospital beds per capita         |                                               |                                               |                                               |                                             |                                   |                      |                       | 1.125*<br>(0.580)       |
| Constant                         | -62.74***<br>(14.16)                          | -68.05***<br>(14.00)                          | -68.86***<br>(13.98)                          | -67.23***<br>(14.44)                        | -57.21***<br>(20.36)              | -23.13***<br>(6.292) | -28.38***<br>(6.443)  | -23.63***<br>(8.139)    |
| Observations                     | 85                                            | 85                                            | 85                                            | 85                                          | 54                                | 92                   | 91                    | 90                      |
| R-squared                        | 0.577                                         | 0.558                                         | 0.560                                         | 0.557                                       | 0.494                             | 0.601                | 0.684                 | 0.554                   |

**Note:** Table reports results for equation (1). The dependent variable is the share of population that is vaccinated with at least one dose. Robust standard errors. \*\*\*, \*\*, and \* represent statistical significant at 1, 5 and 10 percent respectively.

**Annex Table A5. Robustness Checks - Rollout**

|                                  | (1)<br>Latest<br>caseload | (2)<br>Average cases<br>in 2020 | (3)<br>Peak cases in<br>2020 | (4)<br>Deaths in 2020 | (5)<br>Daily<br>vaccinations | (6)<br>Trust in<br>Government | (7)<br>Political<br>Stability |
|----------------------------------|---------------------------|---------------------------------|------------------------------|-----------------------|------------------------------|-------------------------------|-------------------------------|
| Potential procurement (Jan 2021) | 0.0497***<br>(0.0141)     | 0.0387**<br>(0.0169)            | 0.0480***<br>(0.0151)        | 0.0337*<br>(0.0199)   | 3.587**<br>(1.468)           | 0.0312*<br>(0.0172)           | 0.0356**<br>(0.0177)          |
| Cumulative cases (latest)        | 2.917***<br>(0.459)       |                                 |                              |                       |                              |                               |                               |
| Health index (WEF)               | 7.660***<br>(2.153)       | 10.97***<br>(2.506)             | 8.760***<br>(2.347)          | 13.98***<br>(3.099)   | 931.1***<br>(249.0)          | 8.612***<br>(1.489)           | 6.274***<br>(1.197)           |
| Vaccine acceptance (Jan 2021)    | 30.10***<br>(11.14)       | 26.07**<br>(10.63)              | 29.80***<br>(11.19)          | 27.03**<br>(12.96)    | 2,152**<br>(914.7)           |                               |                               |
| Average cases (2020)             |                           | 18.54***<br>(4.270)             |                              |                       |                              |                               |                               |
| Peak cases (2020)                |                           |                                 | 5.401***<br>(0.977)          |                       |                              |                               |                               |
| Cumulative deaths (end-2020)     |                           |                                 |                              | 64.31<br>(54.74)      |                              |                               |                               |
| Cumulative cases (end-2020)      |                           |                                 |                              |                       | 438.5***<br>(102.2)          | 3.361***<br>(0.907)           | 2.941***<br>(0.936)           |
| Trust in Government (WEF)        |                           |                                 |                              |                       |                              | 3.792***<br>(1.126)           |                               |
| Political Stability (World Bank) |                           |                                 |                              |                       |                              |                               | 8.914***<br>(1.815)           |
| Constant                         | -59.38***<br>(14.00)      | -73.49***<br>(15.27)            | -64.32***<br>(14.29)         | -86.96***<br>(18.13)  | -6,035***<br>(1,365)         | -48.75***<br>(7.669)          | -21.25***<br>(6.464)          |
| Observations                     | 85                        | 85                              | 85                           | 85                    | 86                           | 133                           | 133                           |
| R-squared                        | 0.607                     | 0.549                           | 0.570                        | 0.408                 | 0.448                        | 0.479                         | 0.540                         |

**Note:** Table reports results for equation (1). The dependent variable is the share of population that is vaccinated with at least one dose, except for column (5) where it is the average number of daily vaccinations since the start of the vaccination campaign in the country. Robust standard errors. \*\*\*, \*\*, and \* represent statistical significant at 1, 5 and 10 percent respectively.



**Annex Table A6. Robustness Checks – Impact of Vaccines on Health Outcomes**

|                                         | (1)                     | (2)                                  | (3)                               | (4)                     | (5)                     | (6)                     | (7)                     | (8)                     |
|-----------------------------------------|-------------------------|--------------------------------------|-----------------------------------|-------------------------|-------------------------|-------------------------|-------------------------|-------------------------|
|                                         | 1% winsorized           | drop late:<br>start after<br>March 1 | drop early:<br>5% before Feb<br>1 | without<br>APD          | without<br>EUR          | without<br>MCD          | without<br>WHD          | without<br>AFR          |
| Vaccine 1 <sup>st</sup> dose per capita | -0.000910***<br>(0.000) | -0.001011***<br>(0.000)              | -0.000681**<br>(0.000)            | -0.001014***<br>(0.000) | -0.000200<br>(0.000)    | -0.001029***<br>(0.000) | -0.001217***<br>(0.000) | -0.001009***<br>(0.000) |
| Containment measures (21 days lag)      | -0.011812<br>(0.008)    | -0.011802<br>(0.010)                 | -0.007546<br>(0.008)              | 0.001206<br>(0.003)     | 0.001201<br>(0.003)     | 0.000418<br>(0.003)     | 0.001791<br>(0.003)     | 0.001885<br>(0.003)     |
| Mobility (21 days lag)                  | 0.000089**<br>(0.000)   | 0.000114**<br>(0.000)                | 0.000119***<br>(0.000)            | -0.013693<br>(0.012)    | -0.005394<br>(0.005)    | -0.005564<br>(0.008)    | -0.012225<br>(0.009)    | -0.013662<br>(0.010)    |
| Lagged cases/pop                        | -0.003545*<br>(0.002)   | 0.002013<br>(0.003)                  | 0.001909<br>(0.004)               | 0.000093**<br>(0.000)   | 0.000052*<br>(0.000)    | 0.000108**<br>(0.000)   | 0.000128***<br>(0.000)  | 0.000110***<br>(0.000)  |
| Constant                                | -2.078319<br>(1.468)    | -1.915697<br>(1.353)                 | -1.935092<br>(1.250)              | -1.368766<br>(1.617)    | -6.560121***<br>(1.913) | -1.575337<br>(1.455)    | 4.209801*<br>(2.464)    | -2.041791<br>(1.400)    |
| Observations                            | 13,542                  | 11,093                               | 12,711                            | 11,307                  | 8,414                   | 11,905                  | 10,692                  | 11,845                  |
| R-squared                               | 0.587                   | 0.605                                | 0.597                             | 0.609                   | 0.782                   | 0.605                   | 0.598                   | 0.608                   |
| Health policy controls                  | Yes                     | Yes                                  | Yes                               | Yes                     | Yes                     | Yes                     | Yes                     | Yes                     |
| Country FE                              | Yes                     | Yes                                  | Yes                               | Yes                     | Yes                     | Yes                     | Yes                     | Yes                     |
| Time FE                                 | Yes                     | Yes                                  | Yes                               | Yes                     | Yes                     | Yes                     | Yes                     | Yes                     |
| No. of countries                        | 126                     | 90                                   | 119                               | 104                     | 88                      | 108                     | 100                     | 104                     |

**Notes:** Table reports results for equation (2). The dependent variable is new COVID-19 cases per capita. Vaccine 1<sup>st</sup> dose per capita is lagged 21 days. The regressions control for stringency of containment measures, other non-pharmaceutical interventions and health policy controls (21 lags), lags of mobility (21 lags), lagged cases or reproduction rate, country specific time trends, as well as country and time fixed effects. Standard errors are clustered at the country level. \*\*\*, \*\*, and \* represent statistical significant at 1, 5 and 10 percent respectively. APD denotes Asia-Pacific, EUR denotes Europe, MCD denotes Middle East & Central Asia, WHD denotes Western Hemisphere and AFR denotes Africa.

**Annex Table A7.** Effect of neighboring COVID-19 cases on domestic COVID-19 cases, using alternative weights

|                                                 | (1)                     | (2)                     | (3)                     | (4)                     |
|-------------------------------------------------|-------------------------|-------------------------|-------------------------|-------------------------|
|                                                 | New COVID-19 Cases      | New COVID-19 Cases      | New COVID-19 Cases      | New COVID-19 Cases      |
| Vaccinated persons, 1 dose                      | -0.000930***<br>(0.000) | -0.000824***<br>(0.000) | -0.000818***<br>(0.000) | -0.000801***<br>(0.000) |
| Vaccinated persons, 2 doses                     |                         | -0.000282<br>(0.000)    |                         | -0.000051<br>(0.000)    |
| Neighbor cases (all capital cities, 7 days lag) | 1.393726***<br>(0.521)  | 1.415165***<br>(0.520)  |                         |                         |
| Neighbor cases (trade weights, 7 days lag)      |                         |                         | 4.287295***<br>(0.966)  | 4.295574***<br>(0.984)  |
| COVID-19 cases (lag)                            | -0.001302<br>(0.003)    | -0.001059<br>(0.003)    | -0.000987<br>(0.003)    | -0.000874<br>(0.003)    |
| Containment measures index (lag)                | -0.009292<br>(0.008)    | -0.010286<br>(0.008)    | -0.008972<br>(0.008)    | -0.009220<br>(0.008)    |
| Mobility (lag)                                  | 0.000106***<br>(0.000)  | 0.000111***<br>(0.000)  | 0.000102***<br>(0.000)  | 0.000105***<br>(0.000)  |
| Observations                                    | 13,241                  | 13,154                  | 13,468                  | 13,381                  |
| R-squared                                       | 0.635                   | 0.635                   | 0.634                   | 0.634                   |
| Health Policy Controls                          | Yes                     | Yes                     | Yes                     | Yes                     |
| Country FE                                      | Yes                     | Yes                     | Yes                     | Yes                     |
| Time FE                                         | Yes                     | Yes                     | Yes                     | Yes                     |
| No. of countries                                | 123                     | 123                     | 124                     | 124                     |

**Note:** Table reports results for equation (7). The dependent variable is new COVID-19 cases. A spillover term “Neighbor cases” (lag 7 days) is introduced to the equation to capture the effects of neighboring COVID-19 new cases on a country’s own caseload using bilateral distance weights (equation 6). The regressions control for stringency of containment measures, other non-pharmaceutical interventions and health policy controls (21 lags), lags of mobility (21 lags), lagged new cases, country-specific time-trends, as well as country and time fixed-effects. Standard errors are clustered at the country level. \*\*\*, \*\*, and \* represent statistical significant at 1, 5 and 10 percent respectively.

**Annex Figure A1.** Vaccine Procurement Deals by Income Groups (weighted average, percent of the population to be vaccinated)

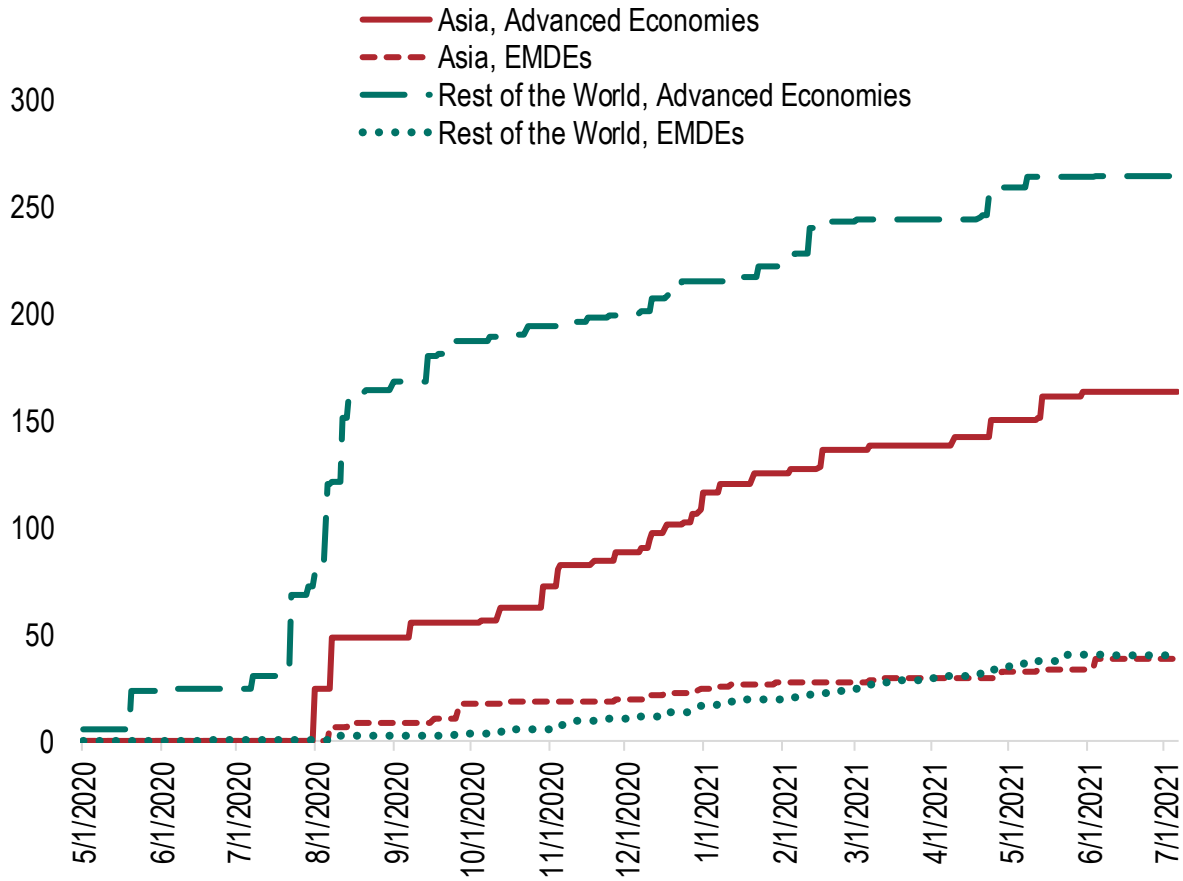

**Note:** countries are grouped per income level and weighted by population. Procurement deals include those already confirmed, potential deals, and donations. Source: Duke University Health Innovation Center and author calculations.

**Annex Figure A2.** Procurement per 100 population by region (orders, excluding potential orders)

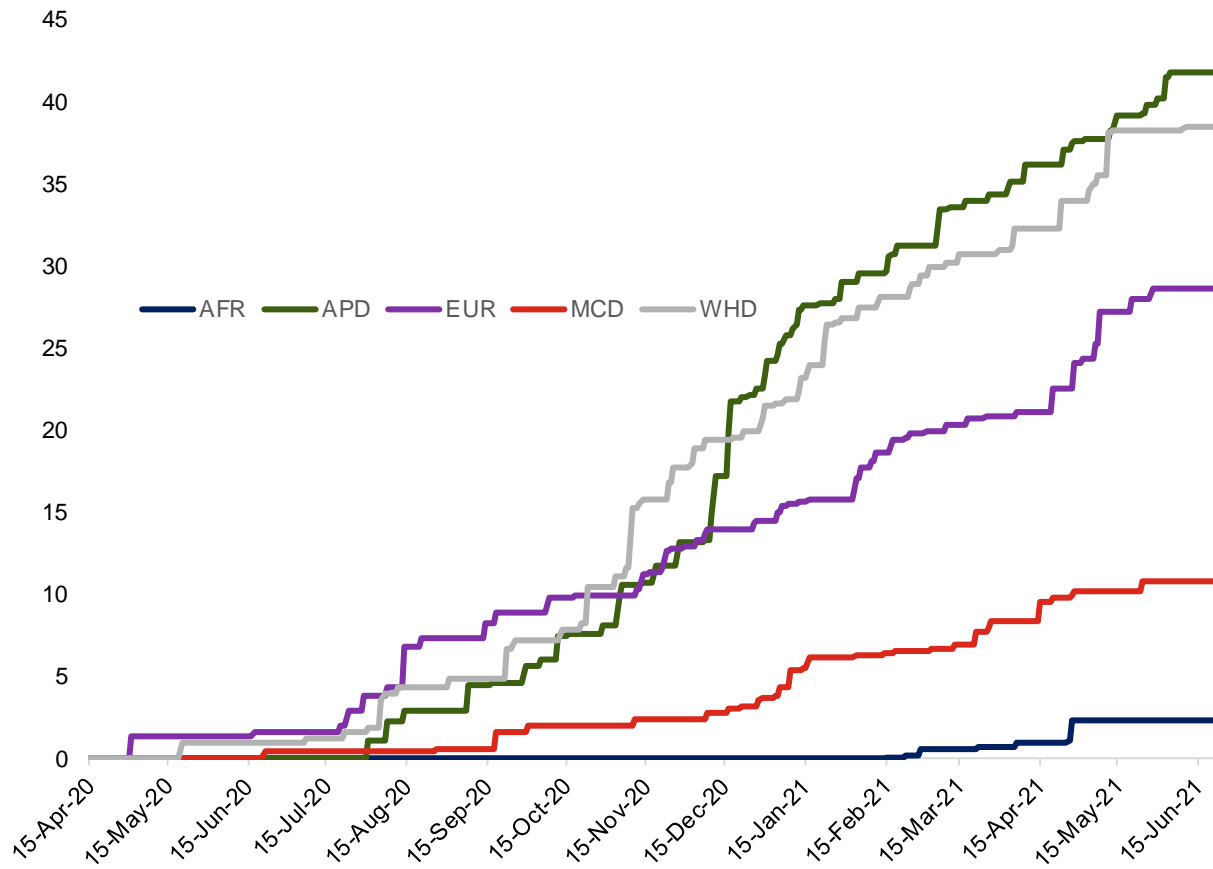

**Note:** The chart includes confirmed orders, potential deals, and donations. AFR: Sub-Saharan Africa; APD: Asia Pacific Department; EUR: European Department; MCD: Middle East and Central Asia Department; WHD: Western Hemisphere Department.

**Source:** Duke University Health Innovation Center and author calculations.

**Annex Figure A3. Determinants of vaccine rollout**

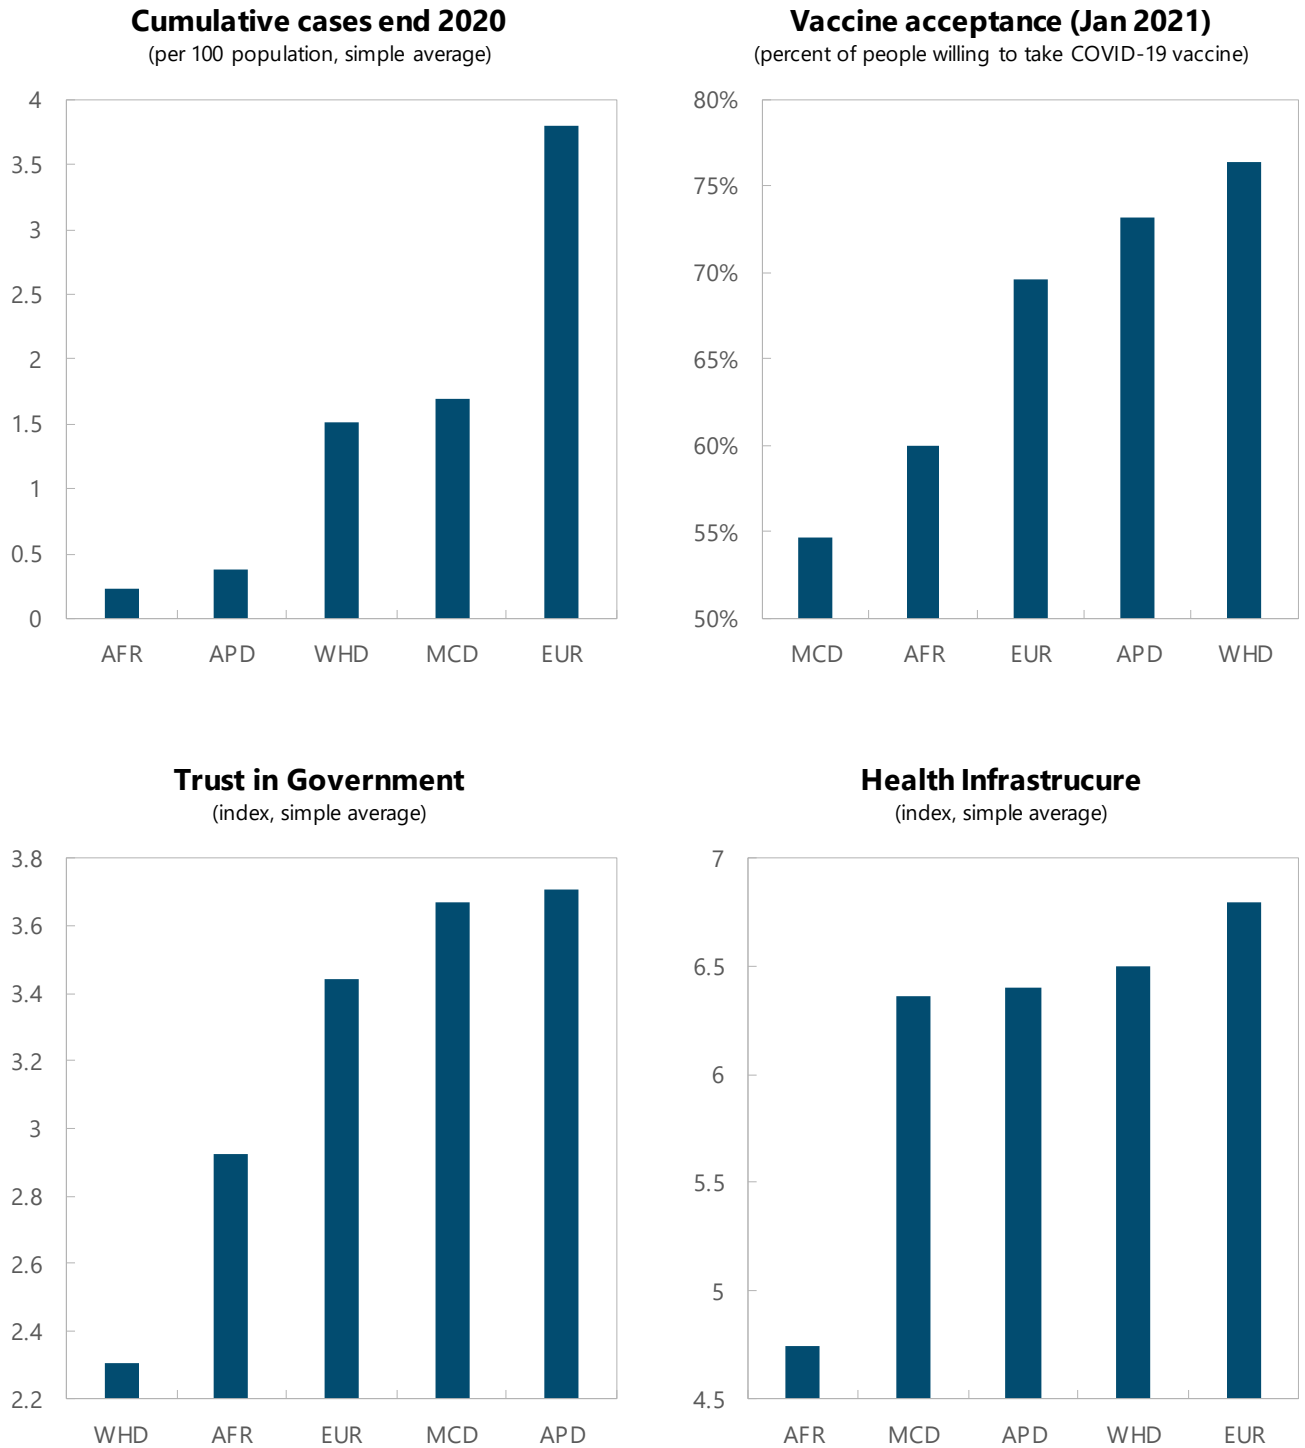

**Note:** AFR: Sub-Saharan Africa; APD: Asia Pacific Department; EUR: European Department; MCD: Middle East and Central Asia Department; WHD: Western Hemisphere Department.

**Sources:** Johns Hopkins University; University of Maryland and Global Competitiveness Report.
